# Supplementary material for: Injectable chondroitin sulfate-grafted self-antioxidant hydrogels ameliorate nucleus pulposus degeneration against overactive inflammation
Source: Royal Society of Chemistry journal article supplement (doi:10.1039/d3bm00359k), 2023-01-01
Supplement: d3bm00359k1.pdf [file d3bm00359k1.pdf]

## Supplementary Information

### Injectable chondroitin sulfate grafted self-antioxidant hydrogel ameliorates nucleus pulposus degeneration against overactive inflammation

Huitong Luo<sup>a,b</sup>, Zetao Wang<sup>a,b</sup>, Zhichao He<sup>a,b</sup>, Zemin Ling<sup>c</sup>, Hao Wang<sup>d</sup>, Jiayi Zhu<sup>d</sup>, Jingjun Nie<sup>g</sup>, Dafu Chen<sup>g</sup>, Qi Feng<sup>\*,a,b,e</sup>, and Xiaodong Cao<sup>\*,a,b,e,f</sup>

a. Department of Biomedical Engineering, School of Materials Science and Engineering, South China University of Technology, Guangzhou, 510006, China

b. National Engineering Research Center for Tissue Restoration and Reconstruction (NERC-TRR), South China University of Technology, Guangzhou, 510006, China

c. Guangdong Provincial Key Laboratory of Orthopedics and Traumatology, Department of Spinal Surgery, The First Affiliated Hospital of Sun Yat-sen University, Guangzhou 510080, China

d. School of Medicine, South China University of Technology, Guangzhou 510006, China

e. Key Laboratory of Biomedical Materials and Engineering of the Ministry of Education, South China University of Technology, Guangzhou 510006, China

f. Key Laboratory of Biomedical Engineering of Guangdong Province, South China University of Technology, Guangzhou, 510641, China

g. Laboratory of Bone Tissue Engineering, Beijing Laboratory of Biomedical Materials, National Center for Orthopaedics, Beijing Research Institute of Traumatology and Orthopaedics, Beijing Jishuitan Hospital, Beijing, 100035, China

\* Corresponding Author

*E-mail address:* feng2119@scut.edu.cn (Qi Feng), caoxd@scut.edu.cn (Xiaodong Cao)

Table S1. Primers sequences used in RT-qPCR

| Gene          | Primer sequence (5'-3')    |
|---------------|----------------------------|
| TNF- $\alpha$ | F: GACAAGCCTGTAGCCCATGT    |
|               | R: CTCTGATGGCACCACCAACT    |
| IL-6          | F: TTCGGTCCAGTTGCCTTCTC    |
|               | R: GCCTCTTTGCTGCTTTCACA    |
| MMP3          | F: CACTCACAGACCTGACTCGG    |
|               | R: AGTCAGGGGGAGGTCCATAG    |
| MMP13         | F: TCCTGATGTGGGTGAATACAATG |
|               | R: GCCATCGTGAAGTCTGGTAAAAT |
| ADAMTS5       | F: GCCTCTCCCATGACGATTCC    |
|               | R: TCGTGGTAGGTCCAGCAAAC    |
| COL II        | GGTAAGTGGGGCAAGACTGTTA     |
|               | TGTTGTTTCTGGGTTCAGGTTT     |
| ACAN          | GTCAGATACCCCATCCCACTC      |
|               | CATAAAAGACCTCACCTCCAT      |
| GAPDH         | F: GAAGGTCGGAGTCAACGG      |
|               | R: GGAAGATGGTGATGGGATT     |

Table S2. Histological grades of IVD

---

| Histological grades IVD                                                                                                                           |
|---------------------------------------------------------------------------------------------------------------------------------------------------|
| I. Cellularity of the annulus fibrosus                                                                                                            |
| Grade:                                                                                                                                            |
| 1. Fibroblasts comprise >75% of the cells                                                                                                         |
| 2. Neither fibroblasts nor chondrocytes comprise >75% of the cells                                                                                |
| 3. Chondrocytes comprise >75% of the cells                                                                                                        |
| II. Morphology of the annulus fibrosus                                                                                                            |
| Grade:                                                                                                                                            |
| 1. Well-organized collagen lamellae without ruptured or serpentine fibers                                                                         |
| 2. Inward bulging, ruptured or serpentine fibers in less than one third of the annulus                                                            |
| 3. Inward bulging, ruptured or serpentine fibers in more than one third of the annulus                                                            |
| III. Border between the annulus fibrosus and nucleus pulposus                                                                                     |
| Grade:                                                                                                                                            |
| 1. Normal, without any interruption                                                                                                               |
| 2. Minimal interruption                                                                                                                           |
| 3. Moderate or severe interruption                                                                                                                |
| IV. Cellularity of the nucleus pulposus                                                                                                           |
| Grade:                                                                                                                                            |
| 1. Normal cellularity with stellate shaped nuclear cells evenly distributed throughout the nucleus                                                |
| 2. Slight decrease in the number of cells with some clustering                                                                                    |
| 3. Moderate or severe decrease (>50%) in the number of cells with all the remaining cells clustered and separated by dense areas of proteoglycans |
| V. Morphology of the nucleus pulposus                                                                                                             |
| Grade:                                                                                                                                            |
| 1. Round, comprising at least half of the disc area in midsagittal sections                                                                       |
| 2. Rounded or irregularly shaped, comprising one quarter to half of the disc area in midsagittal sections                                         |
| 3. Irregularly shaped, comprising less than one quarter of the disc area in midsagittal sections                                                  |

---

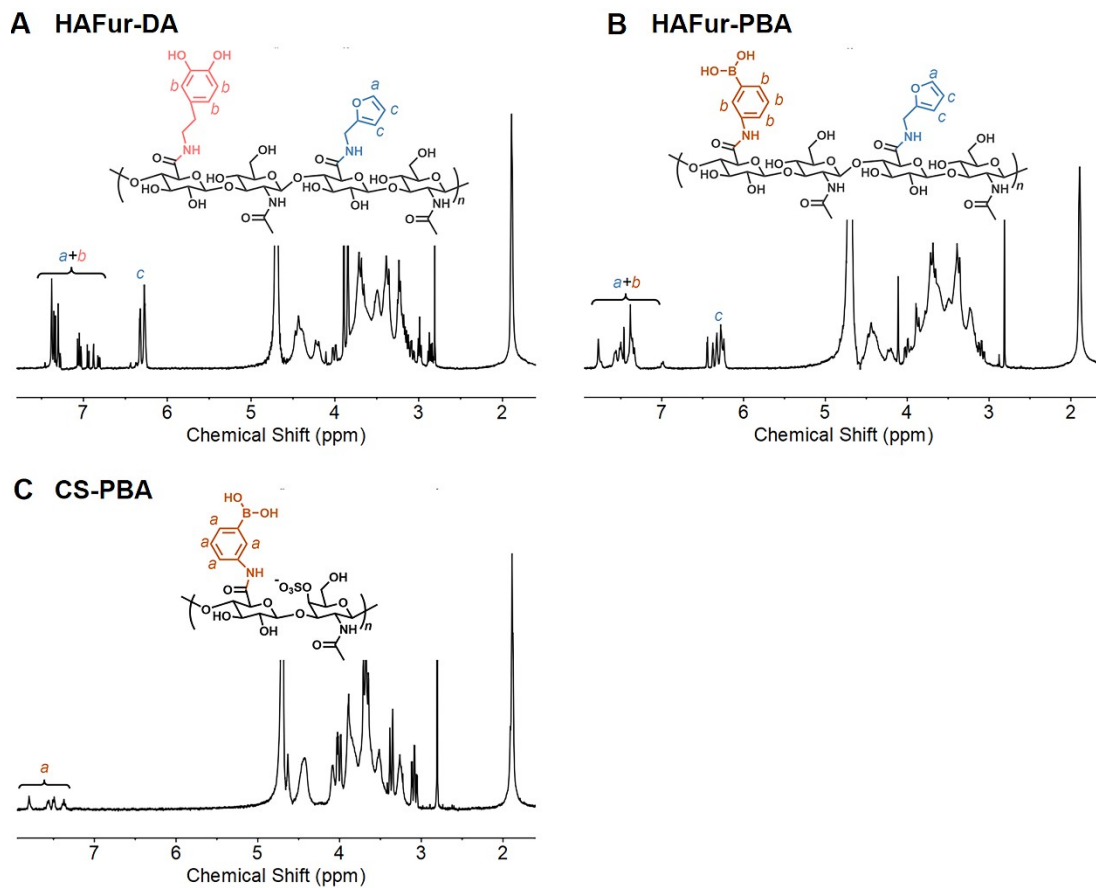

Fig. S1  $^1\text{H}$  NMR spectra of (A) HAFur-DA, (B) HAFur-PBA and (C) CS-PBA.

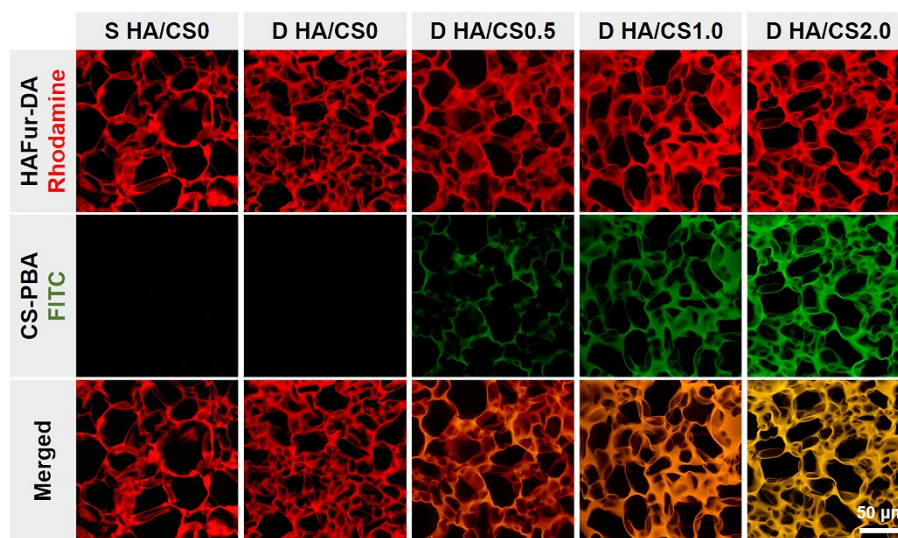

Fig. S2 CLSM images of single crosslinked and double crosslinked hydrogels (HAFur-DA is labeled by Rhodamine and CS-PBA is labeled by FITC).

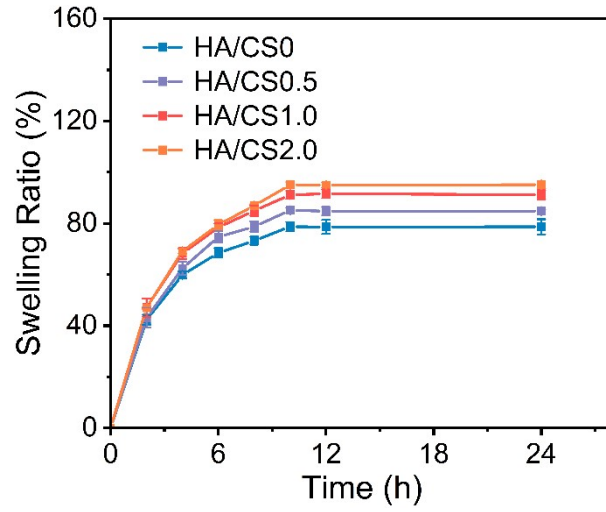

Fig. S3 Swelling ratio of double crosslinked hydrogels.

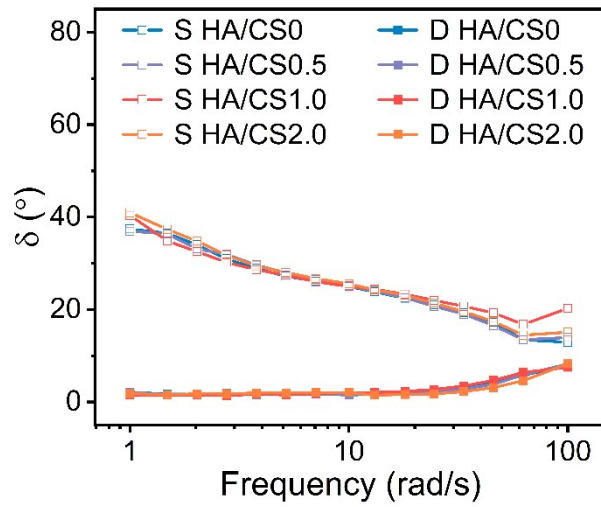

Fig. S4 Phase shift angle ( $\delta$ ) of different hydrogels under frequency sweep (1-100 rad/s) with constant strain ( $\gamma = 1\%$ ).

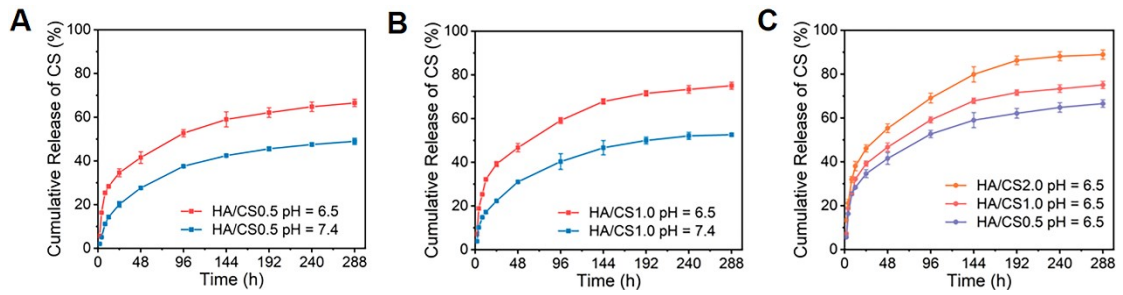

Fig. S5 CS release behavior of double crosslinked HA/CS hydrogels.

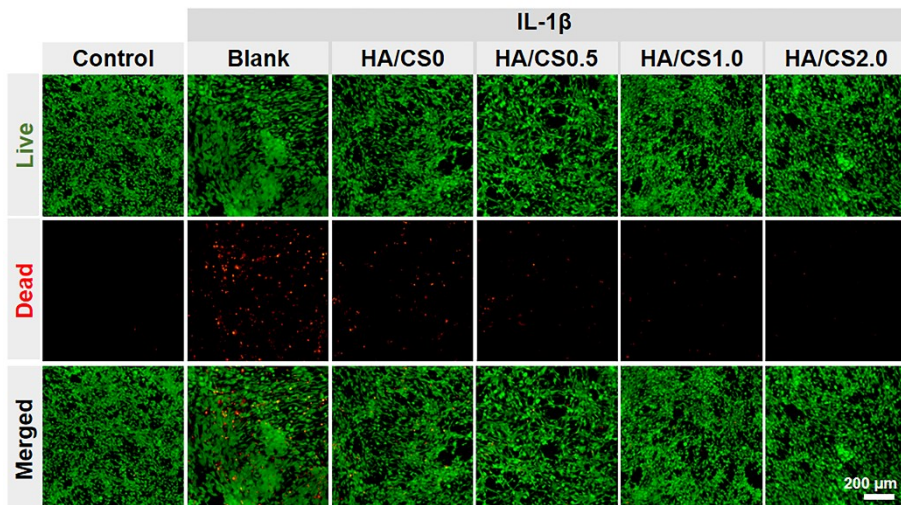

Fig. S6 Live/Dead staining of NPCs exposed to IL-1 $\beta$  with or without hydrogel treatment.

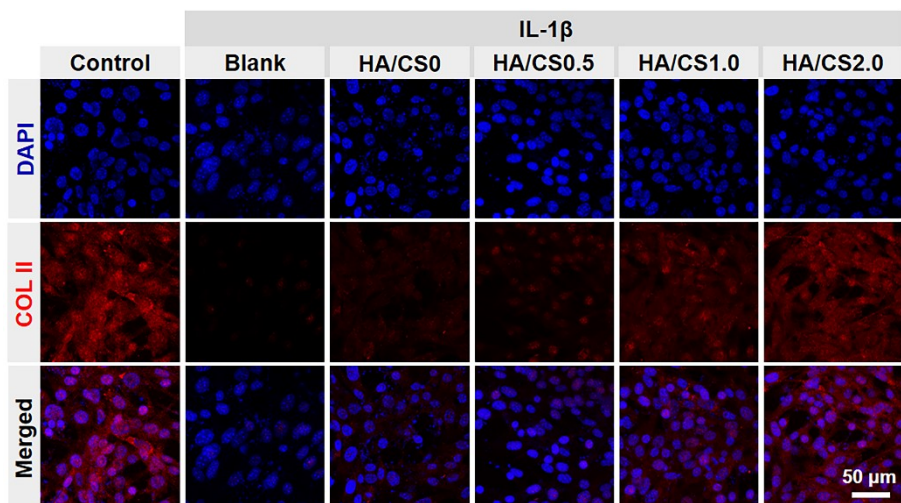

Fig. S7 Immunofluorescence staining of COL II in NPCs with different treatments.
